# Supplementary material
Source: PubMed Central journal article supplement (PMC3992469)
Supplement: NIHMS565955-supplement-Supplemental_Material.pdf [file NIHMS565955-supplement-Supplemental_Material.pdf]

**SUPPLEMENTAL MATERIAL**

**Supplemental Table 1. Association of pre-contrast T1 times with LV structural and functional measures in participants without LGE scar: Estimated Regression coefficient (standard error in parenthesis)**

|                | <b>R<sup>2</sup></b> | <b>Model 1</b>          | <b>Model 2</b>          | <b>Model 3</b>          |
|----------------|----------------------|-------------------------|-------------------------|-------------------------|
| <b>Ecc</b>     | 0.27                 | <b>-0.072 (0.02) **</b> | <b>-0.082 (0.02) **</b> | <b>-0.074 (0.01) **</b> |
| <b>EDSR</b>    | 0.13                 | 0.001 (0.002)           | 0.0006 (0.002)          | 0.0002 (0.002)          |
| <b>Torsion</b> | 0.11                 | 0.007 (0.005)           | 0.002 (0.006)           | 0.004 (0.005)           |
| <b>TRR</b>     | 0.11                 | -0.073 (0.06)           | 0.041 (0.06)            | 0.039 (0.06)            |
| <b>LV EF</b>   | 0.12                 | 0.01 (0.04)             | -0.086 (0.04)           | -                       |
| <b>EDVi</b>    | 0.19                 | -0.162 (0.08)           | 0.108 (0.08)            | -                       |
| <b>LVMi</b>    | 0.46                 | <b>-0.311 (0.08) **</b> | 0.036 (0.06)            | -                       |

\*= p<0.05, \*\*=p<0.001

The Coefficient represents the change in LV measures per 10ms change in precontrast T1 time, with adjustments for multiple variables.

Model 1: Unadjusted

Model 2: Adjusted for age, gender, race, BSA, GFR, heart rate, SBP, DBP, Anti hypertensive medication use, History of Diabetes, Smoking status.

Model 3: Adjusted for age, gender, race, BSA, GFR, heart rate, SBP, DBP, Anti hypertensive medication use, History of Diabetes, Smoking status, LV end diastolic mass and volume.

**R<sup>2</sup>**: R-squared values for model 3 (for model 2 if model3 is not available)

EDSR= Early diastolic strain rate, LV Torsion =LV Torsion adjusted for epicardial radius, TRR= Torsional recoil rate, BSA=Body Surface Area, LV EF=LV Ejection fraction, LVEDVi=LV End diastolic volume index, LVMi= LV mass index, SBP= Systolic blood pressure, DBP= Diastolic blood pressure, GFR= Glomerular Filtration rate.

**Supplemental Table 2. Gender specific changes in LV structure and function with pre-contrast T1 times in participants without LGE scar: Estimated Regression Coefficient (Standard Error in parenthesis)**

| <b>Women</b>   |                      |                       |                         |                       |
|----------------|----------------------|-----------------------|-------------------------|-----------------------|
|                | <b>R<sup>2</sup></b> | <b>Model 1</b>        | <b>Model 2</b>          | <b>Model 3</b>        |
| <b>Ecc</b>     | 0.25                 | <b>-0.086 (0.02)*</b> | <b>-0.105 (0.02) **</b> | <b>-0.090 (0.02)*</b> |
| <b>EDSR</b>    | 0.13                 | 0.002 (0.003)         | 0.005 (0.003)           | 0.004 (0.003)         |
| <b>Torsion</b> | 0.15                 | 0.001 (0.007)         | -0.003 (0.007)          | -0.007 (0.007)        |
| <b>TRR</b>     | 0.09                 | 0.055 (0.08)          | 0.034 (0.08)            | 0.023 (0.08)          |
| <b>LV EF</b>   | 0.02                 | -0.074 (0.05)         | -0.075 (0.05)           | -                     |
| <b>EDVi</b>    | 0.16                 | 0.1 (0.09)            | 0.157 (0.09)            | -                     |
| <b>LVMi</b>    | 0.23                 | 0.075 (0.07)          | 0.031 (0.07)            | -                     |
| <b>Men</b>     |                      |                       |                         |                       |
|                | <b>R<sup>2</sup></b> | <b>Model 1</b>        | <b>Model 2</b>          | <b>Model 3</b>        |
| <b>Ecc</b>     | 0.28                 | 0.01 (0.03)           | -0.035 (0.03)           | -0.038 (0.03)         |
| <b>EDSR</b>    | 0.14                 | -0.008 (0.004)        | -0.005 (0.004)          | -0.004(0.004)         |
| <b>Torsion</b> | 0.10                 | 0.011 (0.09)          | 0.003 (0.01)            | 0.004 (0.009)         |
| <b>TRR</b>     | 0.05                 | 0.015 (0.09)          | 0.027 (0.09)            | 0.022 (0.09)          |
| <b>LV EF</b>   | 0.07                 | -0.108 (0.07)         | -0.099 (0.07)           | -                     |
| <b>EDVi</b>    | 0.13                 | -0.233 (0.16)         | 0.052 (0.15)            | -                     |
| <b>LVMi</b>    | 0.19                 | 0.002 (0.12)          | 0.102 (0.11)            | -                     |

\*=p<0.05, \*\*=p<0.001

The Coefficient represents the change in LV measures per 10 ms increase in precontrast T1 time, with adjustments for multiple variables.

Model 1: Unadjusted

Model 2: Multivariate linear regression adjusted for age, race, BSA, GFR, heart rate, SBP, DBP, Anti hypertensive medication use, History of Diabetes, Smoking status.

Model 3: Adjusted for age, race, BSA, GFR, heart rate, SBP, DBP, Anti hypertensive medication use, History of Diabetes, Smoking status, LV end diastolic mass and volume.

**R<sup>2</sup>**: R-squared values for model 3 (for model 2 if model3 is not available)

EDSR=Early diastolic strain rate, LV Torsion =LV Torsion adjusted for epicardial radius, TRR=Torsional recoil rate, BSA=body surface area, LVEF=Ejection fraction, LVEDVi=LV End diastolic volume index, LVMi = LV mass index, SBP= Systolic blood pressure, DBP= Diastolic blood pressure, GFR= Glomerular Filtration rate.
